# Supplementary material
Source: HighWire-hosted journal article supplement (https://bmjopen.bmj.com/content/12/8/e060896)
Supplement: inline-supplementary-material-1 [file inline-supplementary-material-1.pdf]

## Semi structured interview questionnaire

### General demographic information

1. How old are you?
2. What is your gender?
3. What ethnicity do you belong to?
4. What is your occupation?
5. How many years you are working in this position?
6. What is your highest level of education?
7. What is your marital status?

### Semi- structured questions

1. Please explain your role in the care of T2DM patients in Rotuma hospital?
2. What do you understand about diabetes?
3. What do you know about complications of T2DM?
4. Do you know what foot complications are? Please explain?
5. Discuss and explain the pathophysiology of foot complications in T2DM?
6. Do you counsel your T2DM patients on foot care? Foot complications?
7. What are some of the behaviours of T2DM patients in Rotuma that may be contributing to the developments of DFU?
8. What are your views and opinions on Foot Care Clinic in Rotuma? Challenges?
9. In terms of training and education, what are some of the available options for you as a HCW to update yourself on foot care practice?

### **Ending**

Any last comments on foot complications and foot care services in Rotuma hospital?

Thank you very much for your time and for answering my questions.
